# Supplementary material for: DNA Methylation at Birth Predicts Intellectual Functioning and Autism Features in Children with Fragile X Syndrome
Source: MDPI journal article supplement (doi:10.3390/ijms21207735), 2020-10-19
Supplement: s1 [file s1]

**Table S1:** Correlations between MS-QMA and EpiTYPER in NBS and DBS samples in FXS males.

**Table S2:** Correlations between MS-QMA and EpiTYPER in NBS and DBS samples in FXS females.

**Table S3:** Sensitivity and specificity of NBS FREE2m for FXS versus PM and control females.

**Table S4:** Association between each corrected intellectual functioning score and each NBS FREE2m in FXS males and females.

**Table S5:** Association between each autism features (ADOS-2 scores) and each NBS FREE2m in FXS males and females.

**Table S6:** Association between corrected intellectual functioning scores and NBS FREE2m in FM only males and females.

**Table S7:** Association between autism features scores and NBS FREE2m in FM only males.

**Table S8:** Association between corrected intellectual functioning scores and NBS FREE2m in FXS males and females with complete data.

**Table S9:** Association between autism features scores and NBS FREE2m in FXS males and females with complete data.

**Table S10:** Association between corrected intellectual functioning scores and DBS FREE2m in FXS males and females.

**Table S11:** Association between autism features scores and DBS FREE2m in FXS males and females.

**Table S12:** Association between corrected intellectual functioning scores and DBS FREE2m in FM only males and females.

**Table S13:** Association between autism features scores and DBS FREE2m in FM only males.

**Table S14:** Association between corrected intellectual functioning scores and DBS FREE2m in FXS males and females with complete data.

**Table S15:** Association between autism features scores and DBS FREE2m in FXS males and females with complete data.

**Table S16:** Spearman's rank correlation ( $\rho$ ) between FREE2m in NBS and DBS samples with *FMRI* expression in FXS males and females.

**Table S17:** Spearman's rank correlation ( $\rho$ ) between NBS and DBS FREE2m and *FMRI* mRNA levels in FM only males and females.

**Table S18:** Spearman's rank correlations ( $\rho$ ) between NBS or DBS FREE2m and *FMRI* mRNA levels in FXS males and females with complete data.

**Table S1:** Correlations between MS-QMA and EpiTYPER in NBS and DBS samples in FXS males.

|           | MS-QMA* | EpiTYPER#     | CpG 1             | CpG 2             | CpG 6/7           | CpG 8/9           | CpG 10-12         |
|-----------|---------|---------------|-------------------|-------------------|-------------------|-------------------|-------------------|
| NBS       |         |               |                   |                   |                   |                   |                   |
| MS-QMA*   | 32      | <b>0.001+</b> | <b>0.003+</b>     | <b>0.010+</b>     | 0.585             | <b>0.001+</b>     | <b>0.002+</b>     |
| EpiTYPER# | 0.583   | 30            | <b>&lt;0.001+</b> | <b>&lt;0.001+</b> | <b>&lt;0.001+</b> | <b>&lt;0.001+</b> | <b>&lt;0.001+</b> |
| CpG 1     | 0.530   | 0.644         | 30                | 0.061             | <b>0.026+</b>     | <b>0.007+</b>     | <b>0.001+</b>     |
| CpG 2     | 0.469   | 0.782         | 0.353             | 29                | 0.140             | <b>0.011+</b>     | <b>&lt;0.001+</b> |
| CpG 6/7   | 0.104   | 0.630         | 0.405             | 0.281             | 30                | <i>0.044</i>      | <b>0.022+</b>     |
| CpG 8/9   | 0.566   | 0.777         | 0.484             | 0.467             | 0.370             | 30                | <b>&lt;0.001+</b> |
| CpG 10-12 | 0.553   | 0.878         | 0.569             | 0.655             | 0.416             | 0.733             | 30                |
| DBS       |         |               |                   |                   |                   |                   |                   |
| MS-QMA*   | 24      | 0.181         | <i>0.043</i>      | 0.473             | 0.584             | 0.170             | <i>0.039</i>      |
| EpiTYPER# | 0.283   | 24            | <b>&lt;0.001+</b> | <b>&lt;0.001+</b> | <b>&lt;0.001+</b> | <b>&lt;0.001+</b> | <b>&lt;0.001+</b> |
| CpG 1     | 0.416   | 0.673         | 24                | 0.117             | <b>0.005+</b>     | <i>0.034</i>      | <b>&lt;0.001+</b> |
| CpG 2     | 0.162   | 0.886         | 0.344             | 22                | <i>0.032</i>      | <b>0.001+</b>     | <b>0.001+</b>     |
| CpG 6/7   | -0.121  | 0.675         | 0.570             | 0.468             | 23                | 0.187             | <i>0.033</i>      |
| CpG 8/9   | 0.296   | 0.799         | 0.445             | 0.692             | 0.292             | 23                | <b>0.002+</b>     |
| CpG 10-12 | 0.424   | 0.799         | 0.745             | 0.657             | 0.446             | 0.621             | 24                |

Sample size for each variable (diagonal); Spearman's rank correlation (lower triangle) and its corresponding P-value (upper triangle). \*aggregate of CpG's 2-12; #aggregate computed as mean DNAm at CpG sites 1, 2, 6/7, 8/9 and 10-12; FXS = FM only + PM/FM mosaics; DBS = dried blood spot; MS-QMA = methylation specific-quantitative melt analysis; NBS = newborn blood spot; P-values (p) in bold indicate significance for aggregate measures indicating significance; P-values (p) in bold with + remained <0.05 after adjustment for multiple testing for site specific analyses; italicised no longer <0.05 after adjusting for multiple testing for site specific analyses.

**Table S2:** Correlations between MS-QMA and EpiTYPER in NBS and DBS samples in FXS females.

|           | MS-QMA* | EpiTYPER#     | CpG 1             | CpG 2         | CpG 6/7       | CpG 8/9       | CpG 10-12         |
|-----------|---------|---------------|-------------------|---------------|---------------|---------------|-------------------|
| NBS       |         |               |                   |               |               |               |                   |
| MS-QMA*   | 20      | <b>0.048</b>  | <i>0.035</i>      | <b>0.011+</b> | 0.996         | <b>0.009+</b> | 0.088             |
| EpiTYPER# | 0.486   | 17            | <b>&lt;0.001+</b> | <b>0.001+</b> | <b>0.002+</b> | <b>0.001+</b> | <b>0.001+</b>     |
| CpG 1     | 0.514   | 0.913         | 17                | <b>0.001+</b> | <b>0.026+</b> | <b>0.001+</b> | <b>0.003+</b>     |
| CpG 2     | 0.637   | 0.840         | 0.799             | 15            | 0.256         | <b>0.015+</b> | <i>0.043</i>      |
| CpG 6/7   | 0.002   | 0.709         | 0.553             | 0.326         | 16            | <i>0.036</i>  | 0.229             |
| CpG 8/9   | 0.612   | 0.737         | 0.715             | 0.613         | 0.527         | 17            | <b>0.001+</b>     |
| CpG 10-12 | 0.427   | 0.738         | 0.669             | 0.528         | 0.319         | 0.789         | 17                |
| DBS       |         |               |                   |               |               |               |                   |
| MS-QMA*   | 18      | <b>0.003+</b> | <b>0.006+</b>     | <b>0.041+</b> | 0.111         | <b>0.005+</b> | <b>0.001+</b>     |
| EpiTYPER# | 0.655   | 18            | <b>0.001+</b>     | <b>0.007+</b> | <b>0.001+</b> | <b>0.001+</b> | <b>&lt;0.001+</b> |
| CpG 1     | 0.626   | 0.942         | 18                | <b>0.026+</b> | <b>0.001+</b> | <b>0.001+</b> | <b>&lt;0.001+</b> |
| CpG 2     | 0.500   | 0.626         | 0.538             | 17            | <b>0.028+</b> | <b>0.009+</b> | <b>0.020+</b>     |
| CpG 6/7   | 0.414   | 0.887         | 0.790             | 0.549         | 16            | <b>0.001+</b> | <b>&lt;0.001+</b> |
| CpG 8/9   | 0.648   | 0.976         | 0.939             | 0.631         | 0.833         | 17            | <b>&lt;0.001+</b> |
| CpG 10-12 | 0.732   | 0.941         | 0.853             | 0.576         | 0.794         | 0.921         | 17                |

Sample size for each variable (diagonal); Spearman's rank correlation (lower triangle) and its corresponding P-value (upper triangle). \*aggregate of CpG's 2-12; #aggregate computed as mean DNAm at CpG sites 1, 2, 6/7, 8/9 and 10-12; FXS = FM only + PM/FM mosaics; DBS = dried blood spot; MS-QMA = methylation specific-quantitative melt analysis; NBS = newborn blood spot; P-values (p) in bold indicate significance for aggregate measures indicating significance; P-values (p) in bold with + remained <0.05 after adjustment for multiple testing for site specific analyses; italicised no longer <0.05 after adjusting for multiple testing for site specific analyses.

**Table S3:** Sensitivity and specificity of NBS FREE2m for FXS versus PM and control females.

|           |           |           | Sensitivity |             | Specificity |             | AUC      |             |    |    |    |     |
|-----------|-----------|-----------|-------------|-------------|-------------|-------------|----------|-------------|----|----|----|-----|
|           | FXS/PM/CN | Threshold | Estimate    | 95% CI      | Estimate    | 95% CI      | Estimate | 95% CI      | TP | FN | FP | TN  |
| MS-QMA*   | 21/10/95  | 0.373     | 85.7%       | 63.7%-97.0% | 95.2%       | 89.2%-98.4% | 90.5%    | 82.5%-98.4% | 18 | 3  | 5  | 100 |
| EpiTYPER# | 19/10/72  | 0.478     | 100%        | 82.4%-100%  | 98.8%       | 93.4%-99.9% | 99.4%    | 98.2%-100%  | 19 | 0  | 1  | 81  |

The above table presents data from the analyses of EpiTYPER data performed excluding the control outlier (EpiTYPER aggregate MOR = 0.527) and reflects data reported in the paper. Sensitivity, specificity and AUC for FXS versus PMs and controls was estimated using optimal threshold, determined using the Youden method. \*aggregate of CpG’s 2-12; #aggregate computed as mean DNAm at CpG sites 1, 2, 6/7, 8/9 and 10-12; FXS = FM only + PM/FM mosaics; AUC = area under the receiver operating characteristic (ROC) curve; CI = confidence interval; MS-QMA = methylation specific-quantitative melt analysis; TP = True positive; FN = False negative; FP = False Positive; TN = True negative.

**Table S4:** Association between each corrected intellectual functioning score and each NBS FREE2m in FXS males and females.

|           | FXS male |       |      |                   | FXS female |       |      |       |
|-----------|----------|-------|------|-------------------|------------|-------|------|-------|
|           | N        | Coef  | s.e  | p                 | N          | Coef  | s.e  | p     |
| cFSIQ     |          |       |      |                   |            |       |      |       |
| MS-QMA*   | 24       | -58.4 | 22.1 | <b>0.015</b>      | 15         | 11.7  | 48.3 | 0.812 |
| EpiTYPER# | 23       | -116  | 23.4 | <b>&lt;0.001</b>  | 14         | -34.7 | 61.5 | 0.583 |
| CpG 1     | 23       | -96.6 | 32.8 | <b>0.008+</b>     | 14         | 1.59  | 49.6 | 0.975 |
| CpG 2     | 22       | -78.0 | 18.2 | <b>&lt;0.001+</b> | 12         | -81.8 | 60.1 | 0.203 |
| CpG 6/7   | 23       | -54.2 | 24.1 | <b>0.036+</b>     | 14         | -62.7 | 41.6 | 0.158 |
| CpG 8/9   | 23       | -82.2 | 20.3 | <b>0.001+</b>     | 14         | 0.47  | 48.7 | 0.993 |
| CpG 10-12 | 23       | -91.1 | 22.0 | <b>&lt;0.001+</b> | 14         | 19.2  | 44.2 | 0.672 |
| cVIQ      |          |       |      |                   |            |       |      |       |
| MS-QMA*   | 24       | -50.5 | 17.9 | <b>0.010</b>      | 15         | 3.19  | 34.9 | 0.927 |
| EpiTYPER# | 23       | -77.6 | 21.1 | <b>0.001</b>      | 14         | -55.3 | 55.8 | 0.321 |
| CpG 1     | 23       | -68.0 | 24.8 | <b>0.012+</b>     | 14         | -9.75 | 42.2 | 0.817 |
| CpG 2     | 22       | -50.4 | 17.7 | <b>0.010+</b>     | 12         | -98.7 | 71.2 | 0.196 |
| CpG 6/7   | 23       | -38.7 | 20.7 | 0.076             | 14         | -74.3 | 48.1 | 0.148 |
| CpG 8/9   | 23       | -57.8 | 18.8 | <b>0.006+</b>     | 14         | -19.4 | 41.0 | 0.637 |
| CpG 10-12 | 23       | -58.6 | 21.2 | <b>0.012+</b>     | 14         | 9.65  | 38.9 | 0.804 |
| cPIQ      |          |       |      |                   |            |       |      |       |
| MS-QMA*   | 24       | -81.6 | 26.2 | <b>0.005</b>      | 15         | 15.6  | 46.9 | 0.746 |
| EpiTYPER# | 23       | -148  | 28.2 | <b>&lt;0.001</b>  | 14         | -7.03 | 62.4 | 0.912 |
| CpG 1     | 23       | -121  | 40.7 | <b>0.008+</b>     | 14         | 22.3  | 52.1 | 0.677 |
| CpG 2     | 22       | -103  | 21.1 | <b>&lt;0.001+</b> | 12         | -54.6 | 58.6 | 0.373 |
| CpG 6/7   | 23       | -65.3 | 30.1 | <b>0.043+</b>     | 14         | -26.7 | 43.9 | 0.555 |
| CpG 8/9   | 23       | -101  | 25.5 | <b>&lt;0.001+</b> | 14         | 8.25  | 49.5 | 0.870 |
| CpG 10-12 | 23       | -120  | 25.8 | <b>&lt;0.001+</b> | 14         | 11.9  | 45.6 | 0.799 |

Age was controlled in all analyses with FXS male corrected IQ data. Age was not associated with IQ in FXS females and thus was not adjusted. Psychotropic medication use was not associated with IQ results in either sex, thus was not adjusted. \*aggregate of CpG's 2-12; #aggregate computed as mean DNAm at CpG sites 1, 2, 6/7, 8/9 and 10-12; FXS = FM only + PM/FM mosaics. cFSIQ = corrected fullscale intelligence quotient; MS-QMA = methylation specific-quantitative melt analysis; NBS = newborn blood spot; cPIQ = corrected performance intelligence quotient; cVIQ = corrected verbal intelligence quotient; +P-value in bold (p) remained <0.05 after adjustment for multiple testing of CpG 1 to CpG10-12.

**Table S5:** Association between each autism features (ADOS-2 scores) and each NBS FREE2m in FXS males and females.

|            | FXS male |       |      |               | FXS female |       |      |       |
|------------|----------|-------|------|---------------|------------|-------|------|-------|
|            | N        | Coef  | s.e  | p             | N          | Coef  | s.e  | p     |
| ADOS-2 CSS |          |       |      |               |            |       |      |       |
| MS-QMA*    | 33       | 5.96  | 2.63 | <b>0.030</b>  | 17         | -4.66 | 3.67 | 0.205 |
| EpiTYPER#  | 31       | 6.82  | 4.46 | 0.137         | 16         | -0.13 | 14.6 | 0.993 |
| CpG 1      | 31       | 5.26  | 4.91 | 0.293         | 16         | 0.25  | 9.16 | 0.978 |
| CpG 2      | 30       | 4.20  | 2.97 | 0.169         | 14         | -5.40 | 4.10 | 0.188 |
| CpG 6/7    | 31       | -2.05 | 3.84 | 0.594         | 15         | 8.02  | 5.43 | 0.164 |
| CpG 8/9    | 31       | 10.1  | 3.13 | <b>0.003+</b> | 16         | 0.93  | 13.3 | 0.944 |
| CpG 10-12  | 31       | 6.69  | 3.62 | 0.075         | 16         | -6.53 | 5.49 | 0.234 |
| SA CSS     |          |       |      |               |            |       |      |       |
| MS-QMA*    | 33       | 5.29  | 3.06 | 0.084         | 17         | -2.69 | 4.19 | 0.521 |
| EpiTYPER#  | 31       | 7.68  | 10.1 | 0.447         | 16         | 4.07  | 9.60 | 0.671 |
| CpG 1      | 31       | 6.20  | 5.16 | 0.239         | 16         | 6.14  | 8.81 | 0.485 |
| CpG 2      | 30       | 4.12  | 3.16 | 0.202         | 14         | -1.52 | 5.18 | 0.769 |
| CpG 6/7    | 31       | -2.86 | 3.77 | 0.449         | 15         | 8.86  | 6.24 | 0.179 |
| CpG 8/9    | 31       | 8.85  | 3.25 | <b>0.006+</b> | 16         | 2.14  | 9.02 | 0.813 |
| CpG 10-12  | 31       | 7.51  | 4.88 | 0.124         | 16         | -2.95 | 5.14 | 0.566 |
| RRB CSS    |          |       |      |               |            |       |      |       |
| MS-QMA*    | 33       | 2.48  | 2.09 | 0.233         | 17         | -4.99 | 5.28 | 0.359 |
| EpiTYPER#  | 31       | 1.60  | 3.68 | 0.665         | 16         | -3.99 | 7.31 | 0.594 |
| CpG 1      | 31       | -0.52 | 3.92 | 0.896         | 16         | -3.39 | 5.56 | 0.552 |
| CpG 2      | 30       | 2.00  | 2.32 | 0.395         | 14         | 0.50  | 5.27 | 0.925 |
| CpG 6/7    | 31       | -4.65 | 2.50 | 0.063         | 15         | 5.80  | 5.69 | 0.327 |
| CpG 8/9    | 31       | 5.13  | 2.84 | 0.071         | 16         | -1.91 | 6.16 | 0.761 |
| CpG 10-12  | 31       | 1.26  | 2.51 | 0.615         | 16         | -4.55 | 5.66 | 0.422 |

As age and medical use were not associated with ADOS-2 in either sex the analyses were not adjusted for these confounders; \*aggregate of CpG's 2-12; #aggregate computed as mean DNAm at CpG sites 1, 2, 6/7, 8/9 and 10-12; FXS = FM only + PM/FM mosaics. DBS = dried blood spot; CSS = calibrated severity score; MS-QMA = methylation specific-quantitative melt analysis; NBS = newborn blood spot; RRB = restricted and repetitive behaviours; SA = social affect; +P-value (p) remained <0.05 after adjustment for multiple testing of CpG 1 to CpG10-12.

**Table S6:** Association between corrected intellectual functioning scores and NBS FREE2m in FM only males and females.

|              | FM only Males |       |      |                   | FM only Females |       |      |       |
|--------------|---------------|-------|------|-------------------|-----------------|-------|------|-------|
|              | N             | Coef  | s.e  | p                 | N               | Coef  | s.e  | p     |
| <b>cFSIQ</b> |               |       |      |                   |                 |       |      |       |
| MS-QMA*      | 18            | -38.9 | 9.58 | <b>&lt;0.001</b>  | 13              | 51.2  | 49.6 | 0.318 |
| EpiTYPER#    | 17            | -177  | 28.6 | <b>&lt;0.001</b>  | 12              | 20.2  | 59.2 | 0.740 |
| CpG 1        | 17            | -64.8 | 33.8 | 0.055             | 12              | 29.9  | 44.6 | 0.518 |
| CpG 2        | 16            | -68.5 | 23.0 | <b>0.003+</b>     | 10              | -53.7 | 59.1 | 0.390 |
| CpG 6/7      | 17            | -58.9 | 21.1 | <b>0.005+</b>     | 12              | -19.8 | 43.5 | 0.660 |
| CpG 8/9      | 17            | -76.3 | 19.4 | <b>&lt;0.001+</b> | 12              | 24.7  | 42.1 | 0.570 |
| CpG 10-12    | 17            | -139  | 41.0 | <b>0.001+</b>     | 12              | 47.9  | 37.0 | 0.225 |
| <b>cVIQ</b>  |               |       |      |                   |                 |       |      |       |
| MS-QMA*      | 18            | -51.2 | 18.9 | <b>0.016</b>      | 13              | 35.8  | 40.2 | 0.373 |
| EpiTYPER#    | 17            | -148  | 17.8 | <b>&lt;0.001</b>  | 12              | -10.3 | 61.3 | 0.867 |
| CpG 1        | 17            | -83.0 | 27.6 | <b>0.003+</b>     | 12              | 12.8  | 46.1 | 0.781 |
| CpG 2        | 16            | -48.9 | 24.8 | <i>0.049</i>      | 10              | -81.6 | 76.9 | 0.319 |
| CpG 6/7      | 17            | -64.4 | 15.8 | <b>0.001+</b>     | 12              | -38.2 | 56.3 | 0.513 |
| CpG 8/9      | 17            | -68.8 | 12.9 | <b>&lt;0.001+</b> | 12              | 0.09  | 38.8 | 0.998 |
| CpG 10-12    | 17            | -97.4 | 39.6 | <b>0.014+</b>     | 12              | 33.7  | 36.9 | 0.359 |
| <b>cPIQ</b>  |               |       |      |                   |                 |       |      |       |
| MS-QMA*      | 18            | -61.3 | 32.7 | 0.081             | 13              | 51.2  | 60.2 | 0.413 |
| EpiTYPER#    | 17            | -234  | 33.2 | <b>&lt;0.001</b>  | 12              | 27.1  | 66.9 | 0.694 |
| CpG 1        | 17            | -104  | 73.1 | 0.176             | 12              | 46.8  | 56.7 | 0.428 |
| CpG 2        | 16            | -101  | 28.4 | <b>&lt;0.001+</b> | 10              | -40.9 | 67.5 | 0.561 |
| CpG 6/7      | 17            | -73.8 | 29.5 | <b>0.012+</b>     | 12              | 6.71  | 49.7 | 0.895 |
| CpG 8/9      | 17            | -96.0 | 22.4 | <b>&lt;0.001+</b> | 12              | 24.8  | 47.9 | 0.616 |
| CpG 10-12    | 17            | -186  | 49.8 | <b>&lt;0.001+</b> | 12              | 24.3  | 44.8 | 0.599 |

Age was controlled in all analyses with FXS male corrected IQ data. Age was not associated with IQ results in FXS females, thus was not adjusted. Psychotropic medication use was not associated with IQ results in FXS males or females, thus was not adjusted. \*aggregate of CpG's 2-12; #aggregate computed as mean DNAm at CpG sites 1, 2, 6/7, 8/9 and 10-12; cFSIQ = corrected full scale intelligence quotient; cVIQ = corrected verbal intelligence quotient; cPIQ = corrected performance intelligence quotient; MS-QMA = methylation specific-quantitative melt analysis; NBS = newborn blood spot; P-values (p) in bold indicate significance for aggregate measures indicating significance; P-values (p) in bold with + remained <0.05 after adjustment for multiple testing for site specific analyses; italicised no longer <0.05 after adjusting for multiple testing for site specific analyses.

**Table S7:** Association between autism features (ADOS-2 scores) and NBS FREE2m in FM only males.

|            | N  | Coef  | s.e  | p             |
|------------|----|-------|------|---------------|
| ADOS-2 CSS |    |       |      |               |
| MS-QMA*    | 26 | 4.34  | 3.03 | 0.164         |
| EpiTYPER#  | 24 | 11.7  | 7.50 | 0.134         |
| CpG 1      | 24 | 9.17  | 6.50 | 0.158         |
| CpG 2      | 23 | 1.46  | 4.34 | 0.737         |
| CpG 6/7    | 24 | -1.36 | 4.83 | 0.778         |
| CpG 8/9    | 24 | 11.9  | 3.66 | <b>0.004+</b> |
| CpG 10-12  | 24 | 9.41  | 5.32 | 0.091         |
| SA CSS     |    |       |      |               |
| MS-QMA*    | 26 | 3.12  | 3.87 | 0.420         |
| EpiTYPER#  | 24 | 10.4  | 8.06 | 0.210         |
| CpG 1      | 24 | 10.9  | 10.1 | 0.277         |
| CpG 2      | 23 | 2.28  | 4.83 | 0.637         |
| CpG 6/7    | 24 | -4.07 | 5.88 | 0.488         |
| CpG 8/9    | 24 | 8.90  | 3.57 | <i>0.021</i>  |
| CpG 10-12  | 24 | 9.81  | 5.63 | 0.096         |
| RRB CSS    |    |       |      |               |
| MS-QMA*    | 26 | 1.64  | 2.46 | 0.505         |
| EpiTYPER#  | 24 | 0.83  | 6.69 | 0.902         |
| CpG 1      | 24 | -2.46 | 5.79 | 0.671         |
| CpG 2      | 23 | 0.82  | 4.29 | 0.848         |
| CpG 6/7    | 24 | -7.57 | 4.77 | 0.112         |
| CpG 8/9    | 24 | 5.53  | 3.58 | 0.137         |
| CpG 10-12  | 24 | 1.15  | 4.81 | 0.813         |

As age and psychotropic medication use were not associated with ADOS-2 results the analyses were not adjusted for these confounders. \*aggregate of CpG's 2-12; #aggregate computed as mean DNAm at CpG sites 1, 2, 6/7, 8/9 and 10-12; DBS = dried blood spot; CSS = calibrated severity score; MS-QMA = methylation specific-quantitative melt analysis; NBS = newborn blood spot; RRB = restricted and repetitive behaviours; SA = social affect; P-values (p) in bold with + remained <0.05 after adjustment for multiple testing for site specific analyses; italicised no longer <0.05 after adjusting for multiple testing for site specific analyses.



**Table S8:** Association between corrected intellectual functioning scores and NBS FREE2m in FXS males and females with complete data.

|              | FXS Males |       |      |                   | FXS Females |       |      |               |
|--------------|-----------|-------|------|-------------------|-------------|-------|------|---------------|
|              | N         | Coef  | s.e  | p                 | N           | Coef  | s.e  | p             |
| <b>cFSIQ</b> |           |       |      |                   |             |       |      |               |
| MS-QMA*      | 14        | -61.8 | 31.4 | <b>0.049</b>      | 12          | -20.0 | 30.2 | 0.509         |
| EpiTYPER#    | 13        | -96.5 | 23.2 | <b>0.002</b>      | 12          | -71.6 | 46.5 | 0.124         |
| CpG 1        | 13        | -97.6 | 32.1 | <b>0.012+</b>     | 12          | 7.70  | 40.8 | 0.850         |
| CpG 2        | 12        | -75.1 | 18.0 | <b>&lt;0.001+</b> | 11          | -94.2 | 46.3 | <i>0.042</i>  |
| CpG 6/7      | 12        | -47.2 | 28.4 | 0.097             | 11          | -60.4 | 36.5 | 0.097         |
| CpG 8/9      | 12        | -13.3 | 27.1 | 0.635             | 11          | -54.0 | 41.0 | 0.188         |
| CpG 10-12    | 13        | -81.2 | 21.7 | <b>0.004+</b>     | 11          | -43.3 | 32.5 | 0.183         |
| <b>cVIQ</b>  |           |       |      |                   |             |       |      |               |
| MS-QMA*      | 14        | -52.0 | 21.4 | <b>0.015</b>      | 12          | -37.8 | 29.7 | 0.203         |
| EpiTYPER#    | 13        | -56.9 | 26.0 | 0.054             | 12          | -101  | 41.9 | <b>0.016</b>  |
| CpG 1        | 13        | -56.3 | 32.1 | 0.110             | 12          | -36.5 | 45.1 | 0.417         |
| CpG 2        | 12        | -45.9 | 94.2 | 0.626             | 11          | -134  | 43.2 | <b>0.002+</b> |
| CpG 6/7      | 12        | -38.4 | 27.3 | 0.193             | 11          | -67.9 | 34.5 | <i>0.049</i>  |
| CpG 8/9      | 12        | 6.17  | 29.2 | 0.837             | 11          | -87.1 | 33.0 | <b>0.008+</b> |
| CpG 10-12    | 13        | -49.2 | 23.0 | 0.058             | 11          | -62.3 | 29.0 | <i>0.031</i>  |
| <b>cPIQ</b>  |           |       |      |                   |             |       |      |               |
| MS-QMA*      | 14        | -88.0 | 29.7 | <b>0.003</b>      | 12          | 3.10  | 32.8 | 0.924         |
| EpiTYPER#    | 13        | -120  | 29.0 | <b>0.002</b>      | 12          | -18.5 | 47.8 | 0.698         |
| CpG 1        | 13        | -131  | 36.9 | <b>0.005+</b>     | 12          | 19.9  | 55.2 | 0.719         |
| CpG 2        | 12        | -90.7 | 25.2 | <b>&lt;0.001+</b> | 11          | -46.3 | 52.6 | 0.379         |
| CpG 6/7      | 12        | -41.2 | 23.3 | 0.077             | 11          | -25.3 | 41.3 | 0.540         |
| CpG 8/9      | 12        | -36.7 | 34.7 | 0.318             | 11          | -18.2 | 40.1 | 0.650         |
| CpG 10-12    | 13        | -103  | 26.4 | <b>0.003+</b>     | 11          | -4.10 | 32.7 | 0.900         |

Age was controlled in all analyses; \*aggregate of CpG's 2-12; #aggregate computed as mean DNAm at CpG sites 1, 2, 6/7, 8/9 and 10-12; P-values (p) in bold indicate significance for aggregate measures indicating significance; P-values (p) in bold with + remained <0.05 after adjustment for multiple testing for site specific analyses; italicised no longer <0.05 after adjusting for multiple testing for site specific analyses.

**Table S9:** Association between autism features (ADOS-2 scores) and NBS FREE2m in FXS males and females with complete data.

|            | FXS Males |       |      |       | FXS Females |       |      |              |
|------------|-----------|-------|------|-------|-------------|-------|------|--------------|
|            | N         | Coef  | s.e  | p     | N           | Coef  | s.e  | p            |
| ADOS-2 CSS |           |       |      |       |             |       |      |              |
| MS-QMA*    | 13        | 0.10  | 1.22 | 0.937 | 12          | -0.38 | 11.2 | 0.973        |
| EpiTYPER#  | 12        | 1.09  | 1.71 | 0.536 | 12          | 2.92  | 11.3 | 0.796        |
| CpG 1      | 12        | 1.12  | 2.03 | 0.592 | 12          | 4.72  | 8.68 | 0.587        |
| CpG 2      | 11        | 0.88  | 1.15 | 0.461 | 11          | 4.98  | 13.6 | 0.714        |
| CpG 6/7    | 11        | -0.08 | 1.44 | 0.954 | 11          | 6.57  | 4.95 | 0.184        |
| CpG 8/9    | 11        | 1.17  | 2.04 | 0.579 | 11          | 3.55  | 13.3 | 0.789        |
| CpG 10-12  | 12        | 1.05  | 1.45 | 0.486 | 11          | -4.52 | 11.3 | 0.688        |
| SA CSS     |           |       |      |       |             |       |      |              |
| MS-QMA*    | 13        | -1.86 | 2.76 | 0.515 | 12          | -4.65 | 8.78 | 0.596        |
| EpiTYPER#  | 12        | 1.65  | 3.91 | 0.683 | 12          | 4.80  | 11.2 | 0.669        |
| CpG 1      | 12        | 0.49  | 4.66 | 0.918 | 12          | 8.69  | 8.95 | 0.331        |
| CpG 2      | 11        | 0.59  | 3.09 | 0.852 | 11          | 2.56  | 12.7 | 0.840        |
| CpG 6/7    | 11        | 0.34  | 3.12 | 0.915 | 11          | 7.34  | 3.66 | <i>0.045</i> |
| CpG 8/9    | 11        | 7.02  | 3.84 | 0.100 | 11          | 4.44  | 12.2 | 0.715        |
| CpG 10-12  | 12        | 1.46  | 3.34 | 0.672 | 11          | -2.27 | 10.2 | 0.825        |
| RRB CSS    |           |       |      |       |             |       |      |              |
| MS-QMA*    | 14        | 2.38  | 2.29 | 0.298 | 12          | 7.28  | 4.12 | 0.077        |
| EpiTYPER#  | 13        | -1.32 | 3.88 | 0.733 | 12          | 4.26  | 6.19 | 0.491        |
| CpG 1      | 13        | 0.56  | 3.31 | 0.867 | 12          | 1.41  | 5.53 | 0.798        |
| CpG 2      | 12        | 1.44  | 2.79 | 0.605 | 11          | 15.3  | 7.55 | <i>0.043</i> |
| CpG 6/7    | 12        | -4.34 | 2.45 | 0.076 | 11          | 4.05  | 6.52 | 0.534        |
| CpG 8/9    | 12        | -4.25 | 4.64 | 0.359 | 11          | 4.35  | 4.46 | 0.330        |
| CpG 10-12  | 13        | -0.46 | 2.59 | 0.859 | 11          | 2.17  | 5.73 | 0.705        |

Age was not associated with autism features scores, in both males and females in this sample and therefore not adjusted for; \*aggregate of CpG's 2-12; #aggregate computed as mean DNAm at CpG sites 1, 2, 6/7, 8/9 and 10-12. P-values (p) italicised no longer <0.05 after adjusting for multiple testing for site specific analyses.

**Table S10:** Association between corrected intellectual functioning scores and DBS FREE2m in FXS males and females.

|              | FXS males |       |      |              | FXS females |       |      |       |
|--------------|-----------|-------|------|--------------|-------------|-------|------|-------|
|              | N         | Coef  | s.e  | p            | N           | Coef  | s.e  | p     |
| <b>cFSIQ</b> |           |       |      |              |             |       |      |       |
| MS-QMA*      | 19        | -0.29 | 22.6 | 0.990        | 14          | 51.9  | 49.6 | 0.318 |
| EpiTYPER#    | 19        | -35.9 | 46.3 | 0.438        | 14          | 20.2  | 59.2 | 0.740 |
| CpG 1        | 19        | -17.8 | 40.9 | 0.664        | 14          | 29.9  | 44.6 | 0.518 |
| CpG 2        | 18        | -29.6 | 28.4 | 0.298        | 14          | -53.7 | 59.1 | 0.390 |
| CpG 6/7      | 18        | -18.4 | 27.7 | 0.508        | 13          | -19.8 | 43.5 | 0.660 |
| CpG 8/9      | 18        | 2.82  | 24.2 | 0.907        | 13          | 24.7  | 42.1 | 0.570 |
| CpG 10-12    | 19        | -33.2 | 36.8 | 0.367        | 13          | 47.9  | 37.0 | 0.225 |
| <b>cVIQ</b>  |           |       |      |              |             |       |      |       |
| MS-QMA*      | 19        | -6.14 | 18.1 | 0.740        | 14          | 80.8  | 92.5 | 0.382 |
| EpiTYPER#    | 19        | -35.2 | 18.4 | 0.074        | 14          | -40.8 | 48.8 | 0.403 |
| CpG 1        | 19        | -22.0 | 22.4 | 0.325        | 14          | -10.1 | 22.5 | 0.654 |
| CpG 2        | 18        | -25.7 | 12.1 | 0.051        | 14          | -50.1 | 118  | 0.671 |
| CpG 6/7      | 18        | -17.7 | 17.5 | 0.329        | 13          | -64.0 | 33.3 | 0.055 |
| CpG 8/9      | 18        | -16.2 | 22.7 | 0.485        | 13          | -50.1 | 47.9 | 0.295 |
| CpG 10-12    | 19        | -38.7 | 19.7 | 0.067        | 13          | -40.7 | 41.7 | 0.329 |
| <b>cPIQ</b>  |           |       |      |              |             |       |      |       |
| MS-QMA*      | 19        | -40.1 | 25.8 | 0.139        | 14          | 77.8  | 111  | 0.496 |
| EpiTYPER#    | 19        | -46.9 | 59.1 | 0.427        | 14          | 21.7  | 51.1 | 0.679 |
| CpG 1        | 19        | -16.2 | 37.7 | 0.668        | 14          | 21.6  | 37.5 | 0.575 |
| CpG 2        | 18        | -49.3 | 17.1 | <i>0.011</i> | 14          | 28.0  | 67.0 | 0.684 |
| CpG 6/7      | 18        | -19.1 | 28.2 | 0.497        | 13          | -10.4 | 44.7 | 0.821 |
| CpG 8/9      | 18        | -8.60 | 29.3 | 0.773        | 13          | 25.6  | 56.4 | 0.659 |
| CpG 10-12    | 19        | -32.9 | 50.8 | 0.518        | 13          | 14.8  | 41.9 | 0.730 |

Age was controlled in all analyses with FXS male IQ data. Age was not associated with IQ results in FXS females, so the analysis was not adjusted for this variable. Psychotropic medication use was not associated with IQ results in FXS males or females, thus was not adjusted for in the analyses. \*aggregate of CpG's 2-12; #aggregate computed as mean DNAm at CpG sites 1, 2, 6/7, 8/9 and 10-12; FXS = FM only + PM/FM mosaics; DBS = dried blood spot; cFSIQ = corrected full scale intelligence quotient; MS-QMA = methylation specific-quantitative melt analysis; cPIQ = corrected performance intelligence quotient; cVIQ = corrected verbal intelligence quotient. P-values (p) italicised no longer <0.05 after adjusting for multiple testing for site specific analyses.

**Table S11:** Association between autism features (ADOS-2 scores) and DBS FREE2m in FXS males and females.

|            | FXS males |       |      |       | FXS females |       |      |       |
|------------|-----------|-------|------|-------|-------------|-------|------|-------|
|            | N         | Coef  | s.e  | p     | N           | Coef  | s.e  | p     |
| ADOS-2 CSS |           |       |      |       |             |       |      |       |
| MS-QMA*    | 24        | 5.01  | 3.15 | 0.126 | 17          | -13.4 | 9.87 | 0.196 |
| EpiTYPER#  | 24        | -0.68 | 3.55 | 0.849 | 17          | -0.43 | 5.11 | 0.934 |
| CpG 1      | 24        | 0.85  | 3.49 | 0.811 | 17          | 0.75  | 3.51 | 0.833 |
| CpG 2      | 22        | -0.73 | 2.36 | 0.762 | 16          | -5.57 | 7.33 | 0.461 |
| CpG 6/7    | 23        | -3.66 | 2.93 | 0.224 | 15          | 3.37  | 3.84 | 0.396 |
| CpG 8/9    | 23        | 3.43  | 4.08 | 0.410 | 16          | 0.51  | 4.12 | 0.902 |
| CpG 10-12  | 24        | 0.19  | 3.85 | 0.962 | 16          | -0.89 | 4.55 | 0.847 |
| SA CSS     |           |       |      |       |             |       |      |       |
| MS-QMA*    | 24        | 4.01  | 3.40 | 0.251 | 17          | -11.7 | 10.3 | 0.275 |
| EpiTYPER#  | 24        | 0.66  | 3.74 | 0.862 | 17          | 1.13  | 5.27 | 0.833 |
| CpG 1      | 24        | 1.24  | 3.68 | 0.738 | 17          | 2.16  | 3.58 | 0.556 |
| CpG 2      | 22        | 0.26  | 2.49 | 0.919 | 16          | -5.76 | 7.59 | 0.460 |
| CpG 6/7    | 23        | -2.07 | 3.16 | 0.520 | 15          | 5.21  | 3.79 | 0.192 |
| CpG 8/9    | 23        | 4.86  | 4.23 | 0.264 | 16          | 2.00  | 4.18 | 0.640 |
| CpG 10-12  | 24        | 1.68  | 4.04 | 0.682 | 16          | 0.30  | 4.80 | 0.951 |
| RRB CSS    |           |       |      |       |             |       |      |       |
| MS-QMA*    | 24        | 2.61  | 2.81 | 0.362 | 17          | -3.91 | 7.38 | 0.604 |
| EpiTYPER#  | 24        | -4.42 | 2.91 | 0.143 | 17          | -1.01 | 3.64 | 0.785 |
| CpG 1      | 24        | -4.53 | 2.85 | 0.127 | 17          | -0.28 | 2.50 | 0.912 |
| CpG 2      | 22        | -1.50 | 1.73 | 0.386 | 16          | 0.37  | 5.25 | 0.945 |
| CpG 6/7    | 23        | -5.00 | 2.07 | 0.016 | 15          | -1.17 | 3.08 | 0.710 |
| CpG 8/9    | 23        | -2.45 | 3.53 | 0.495 | 16          | 0.12  | 3.28 | 0.971 |
| CpG 10-12  | 24        | -4.73 | 3.16 | 0.148 | 16          | -1.27 | 3.18 | 0.695 |

As age and psychotropic medication use were not associated with ADOS-2 results in FXS males and females, the analysis was not adjusted for these confounders. \*aggregate of CpG's 2-12; #aggregate computed as mean DNAm at CpG sites 1, 2, 6/7, 8/9 and 10-12; FXS = FM only + PM/FM mosaics. ADOS = Autism diagnostic observation scale; CSS = calibrated severity score; DBS = dried blood spot; MS-QMA = methylation specific-quantitative melt analysis; RRB = restricted and repetitive behaviours; SA = social affect. P-values (p) italicised no longer <0.05 after adjusting for multiple testing for site specific analyses.

**Table S12:** Association between corrected intellectual functioning scores and DBS FREE2m in FM only males and females.

|              | FM only males |       |      |       | FM only females |       |      |       |
|--------------|---------------|-------|------|-------|-----------------|-------|------|-------|
|              | N             | Coef  | s.e  | p     | N               | Coef  | s.e  | p     |
| <b>cFSIQ</b> |               |       |      |       |                 |       |      |       |
| MS-QMA*      | 15            | 15.2  | 17.2 | 0.377 | 12              | 141   | 90.1 | 0.148 |
| EpiTYPER#    | 15            | 3.46  | 18.5 | 0.852 | 12              | 35.2  | 45.1 | 0.453 |
| CpG 1        | 15            | 21.8  | 14.4 | 0.129 | 12              | 21.6  | 29.7 | 0.483 |
| CpG 2        | 14            | -6.37 | 19.7 | 0.747 | 12              | 56.6  | 61.7 | 0.380 |
| CpG 6/7      | 14            | 10.4  | 12.0 | 0.385 | 11              | -7.79 | 41.9 | 0.857 |
| CpG 8/9      | 15            | 2.29  | 28.6 | 0.937 | 11              | 34.6  | 48.6 | 0.495 |
| CpG 10-12    | 15            | -7.74 | 20.4 | 0.705 | 11              | 33.7  | 37.4 | 0.392 |
| <b>cVIQ</b>  |               |       |      |       |                 |       |      |       |
| MS-QMA*      | 15            | 14.3  | 11.7 | 0.223 | 12              | 104   | 86.9 | 0.233 |
| EpiTYPER#    | 15            | -33.2 | 26.4 | 0.233 | 12              | -8.63 | 37.9 | 0.820 |
| CpG 1        | 15            | -2.38 | 23.7 | 0.920 | 12              | -2.82 | 22.8 | 0.902 |
| CpG 2        | 14            | -23.7 | 12.8 | 0.090 | 12              | 2.71  | 59.0 | 0.963 |
| CpG 6/7      | 14            | -8.71 | 17.4 | 0.616 | 11              | -40.3 | 36.9 | 0.275 |
| CpG 8/9      | 15            | -31.8 | 24.3 | 0.215 | 11              | -16.6 | 38.4 | 0.666 |
| CpG 10-12    | 15            | -37.0 | 25.5 | 0.172 | 11              | -7.02 | 29.0 | 0.808 |
| <b>cPIQ</b>  |               |       |      |       |                 |       |      |       |
| MS-QMA*      | 15            | -1.46 | 24.8 | 0.953 | 12              | 93.3  | 121  | 0.457 |
| EpiTYPER#    | 15            | 0.73  | 27.0 | 0.978 | 12              | 41.0  | 53.8 | 0.463 |
| CpG 1        | 15            | 17.0  | 13.2 | 0.197 | 12              | 22.9  | 34.5 | 0.523 |
| CpG 2        | 14            | -28.5 | 29.6 | 0.335 | 12              | 66.9  | 66.7 | 0.339 |
| CpG 6/7      | 14            | 4.46  | 20.1 | 0.824 | 11              | 9.11  | 54.7 | 0.871 |
| CpG 8/9      | 15            | -10.4 | 35.4 | 0.774 | 11              | 46.6  | 56.5 | 0.431 |
| CpG 10-12    | 15            | 9.22  | 22.2 | 0.678 | 11              | 48.3  | 44.2 | 0.303 |

Age was controlled in all analyses with FXS male IQ data. Age was not associated with IQ results in FXS females, so the analysis was not adjusted for this variable. Psychotropic medication use was not associated with IQ results in FXS males or females, thus was not adjusted for in the analyses. \*aggregate of CpG's 2-12; #aggregate computed as mean DNAm at CpG sites 1, 2, 6/7, 8/9 and 10-12; DBS = dried blood spot; MS-QMA = methylation specific-quantitative melt analysis; cFSIQ = corrected full scale intelligence quotient; cPIQ = corrected performance intelligence quotient; cVIQ = corrected verbal intelligence quotient.

**Table S13:** Association between autism features (ADOS-2 scores) and DBS FREE2m in FM only males.

|            | FM only males |       |      |       |
|------------|---------------|-------|------|-------|
|            | N             | Coef  | s.e  | p     |
| ADOS-2 CSS |               |       |      |       |
| MS-QMA*    | 20            | 4.13  | 3.74 | 0.284 |
| EpiTYPER#  | 20            | -0.86 | 3.08 | 0.781 |
| CpG 1      | 20            | 0.52  | 4.35 | 0.907 |
| CpG 2      | 18            | 0.29  | 1.65 | 0.862 |
| CpG 6/7    | 19            | -4.01 | 3.69 | 0.278 |
| CpG 8/9    | 20            | 3.40  | 4.24 | 0.432 |
| CpG 10-12  | 20            | -1.24 | 4.83 | 0.800 |
| SA CSS     |               |       |      |       |
| MS-QMA*    | 20            | 3.18  | 3.99 | 0.435 |
| EpiTYPER#  | 20            | 0.35  | 5.66 | 0.950 |
| CpG 1      | 20            | 1.43  | 4.55 | 0.756 |
| CpG 2      | 18            | 0.78  | 3.51 | 0.824 |
| CpG 6/7    | 19            | -2.12 | 4.58 | 0.643 |
| CpG 8/9    | 20            | 3.30  | 4.46 | 0.469 |
| CpG 10-12  | 20            | 1.10  | 5.07 | 0.831 |
| RRB CSS    |               |       |      |       |
| MS-QMA*    | 20            | 2.45  | 3.52 | 0.495 |
| EpiTYPER#  | 20            | -7.62 | 4.12 | 0.081 |
| CpG 1      | 20            | -7.01 | 3.67 | 0.072 |
| CpG 2      | 18            | -1.69 | 2.53 | 0.505 |
| CpG 6/7    | 19            | -7.25 | 3.12 | 0.033 |
| CpG 8/9    | 20            | -2.37 | 3.95 | 0.556 |
| CpG 10-12  | 20            | -7.71 | 4.09 | 0.075 |

As age and medical use were not associated with ADOS-2 results in FM only males, the analysis was not adjusted for these confounders. \*aggregate of CpG's 2-12; #aggregate computed as mean DNAm at CpG sites 1, 2, 6/7, 8/9 and 10-12; ADOS = Autism diagnostic observation scale; CSS = calibrated severity score; DBS = dried blood spot; MS-QMA = methylation specific-quantitative melt analysis; RRB = restricted and repetitive behaviours; SA = social affect.

**Table S14:** Association between corrected intellectual functioning scores and DBS FREE2m in FXS males and females with complete data.

|              | FXS Males |       |      |               | FXS Females |       |      |       |
|--------------|-----------|-------|------|---------------|-------------|-------|------|-------|
|              | N         | Coef  | s.e  | p             | N           | Coef  | s.e  | p     |
| <b>cFSIQ</b> |           |       |      |               |             |       |      |       |
| MS-QMA*      | 14        | -16.4 | 42.9 | 0.702         | 12          | 9.24  | 68.8 | 0.896 |
| EpiTYPER#    | 13        | -68.1 | 21.9 | <b>0.011</b>  | 12          | -41.0 | 38.9 | 0.292 |
| CpG 1        | 13        | -42.6 | 55.7 | 0.444         | 12          | -10.1 | 23.8 | 0.671 |
| CpG 2        | 12        | -50.0 | 16.3 | <i>0.014</i>  | 11          | -6.50 | 57.1 | 0.910 |
| CpG 6/7      | 12        | -35.7 | 38.5 | 0.354         | 11          | -49.7 | 30.0 | 0.137 |
| CpG 8/9      | 12        | -23.7 | 25.2 | 0.370         | 11          | -46.8 | 49.5 | 0.372 |
| CpG 10-12    | 13        | -73.2 | 29.3 | <i>0.032</i>  | 11          | -32.6 | 33.5 | 0.332 |
| <b>cVIQ</b>  |           |       |      |               |             |       |      |       |
| MS-QMA*      | 14        | -3.30 | 23.2 | 0.887         | 12          | 10.6  | 92.7 | 0.911 |
| EpiTYPER#    | 13        | -49.4 | 20.0 | <b>0.033</b>  | 12          | -66.6 | 36.1 | 0.065 |
| CpG 1        | 13        | -41.5 | 28.0 | 0.139         | 12          | -27.9 | 23.0 | 0.225 |
| CpG 2        | 12        | -34.7 | 14.2 | <i>0.036</i>  | 11          | -40.1 | 45.6 | 0.379 |
| CpG 6/7      | 12        | -37.0 | 23.3 | 0.113         | 11          | -59.2 | 30.1 | 0.084 |
| CpG 8/9      | 12        | -21.4 | 27.2 | 0.451         | 11          | -81.2 | 46.8 | 0.121 |
| CpG 10-12    | 13        | -52.2 | 21.7 | <i>0.037</i>  | 11          | -50.5 | 36.3 | 0.165 |
| <b>cPIQ</b>  |           |       |      |               |             |       |      |       |
| MS-QMA*      | 14        | -39.2 | 51.1 | 0.443         | 12          | 29.7  | 74.7 | 0.700 |
| EpiTYPER#    | 13        | -86.3 | 31.2 | <b>0.020</b>  | 12          | 7.00  | 47.1 | 0.882 |
| CpG 1        | 13        | -35.6 | 59.1 | 0.547         | 12          | 11.8  | 24.0 | 0.623 |
| CpG 2        | 12        | -70.1 | 17.2 | <b>0.003+</b> | 11          | 24.1  | 35.3 | 0.494 |
| CpG 6/7      | 12        | -29.6 | 35.1 | 0.399         | 11          | -11.5 | 34.4 | 0.747 |
| CpG 8/9      | 12        | -45.7 | 32.0 | 0.187         | 11          | 8.42  | 51.9 | 0.875 |
| CpG 10-12    | 13        | -85.7 | 30.9 | <b>0.020+</b> | 11          | 5.60  | 34.1 | 0.869 |

Age was controlled in all analyses; \*aggregate of CpG's 2-12; #aggregate computed as mean DNAm at CpG sites 1, 2, 6/7, 8/9 and 10-12; P-values (p) in bold indicate significance for aggregate measures indicating significance; P-values (p) in bold with + remained <0.05 after adjustment for multiple testing for site specific analyses; italicised no longer <0.05 after adjusting for multiple testing for site specific analyses

**Table S15:** Association between autism features (ADOS-2 scores) and DBS FREE2m in FXS males and females with complete data.

|            | FXS Males |       |      |       | FXS Females |       |      |       |
|------------|-----------|-------|------|-------|-------------|-------|------|-------|
|            | N         | Coef  | s.e  | p     | N           | Coef  | s.e  | p     |
| ADOS-2 CSS |           |       |      |       |             |       |      |       |
| MS-QMA*    | 13        | 0.31  | 1.13 | 0.789 | 12          | -17.5 | 13.0 | 0.180 |
| EpiTYPER#  | 12        | -0.61 | 1.40 | 0.672 | 12          | 2.66  | 6.64 | 0.689 |
| CpG 1      | 12        | -0.93 | 1.27 | 0.481 | 12          | 1.56  | 3.45 | 0.652 |
| CpG 2      | 11        | 0.51  | 0.90 | 0.583 | 11          | -9.01 | 6.85 | 0.188 |
| CpG 6/7    | 11        | -0.19 | 1.20 | 0.876 | 11          | 5.22  | 4.19 | 0.213 |
| CpG 8/9    | 11        | -1.62 | 1.64 | 0.349 | 11          | 4.71  | 8.01 | 0.556 |
| CpG 10-12  | 12        | -1.62 | 1.48 | 0.300 | 11          | 3.28  | 5.69 | 0.564 |
| SA CSS     |           |       |      |       |             |       |      |       |
| MS-QMA*    | 13        | -0.74 | 2.61 | 0.782 | 12          | -12.1 | 14.2 | 0.393 |
| EpiTYPER#  | 12        | -1.76 | 3.16 | 0.589 | 12          | 4.52  | 6.14 | 0.462 |
| CpG 1      | 12        | -1.45 | 2.90 | 0.629 | 12          | 3.95  | 3.13 | 0.207 |
| CpG 2      | 11        | 0.08  | 2.40 | 0.974 | 11          | -5.50 | 8.58 | 0.521 |
| CpG 6/7    | 11        | -0.62 | 2.60 | 0.818 | 11          | 6.15  | 3.66 | 0.093 |
| CpG 8/9    | 11        | -2.37 | 3.66 | 0.534 | 11          | 6.35  | 6.99 | 0.363 |
| CpG 10-12  | 12        | -2.65 | 3.45 | 0.459 | 11          | 3.93  | 4.95 | 0.427 |
| RRB CSS    |           |       |      |       |             |       |      |       |
| MS-QMA*    | 14        | 1.48  | 1.71 | 0.385 | 12          | -13.7 | 10.0 | 0.174 |
| EpiTYPER#  | 13        | -2.08 | 3.80 | 0.585 | 12          | -0.26 | 5.39 | 0.962 |
| CpG 1      | 13        | -3.67 | 2.66 | 0.168 | 12          | -1.72 | 2.38 | 0.470 |
| CpG 2      | 12        | 0.39  | 2.09 | 0.852 | 11          | 4.37  | 11.3 | 0.698 |
| CpG 6/7    | 12        | -3.69 | 2.36 | 0.117 | 11          | 3.57  | 3.10 | 0.249 |
| CpG 8/9    | 12        | -0.92 | 3.80 | 0.809 | 11          | 0.24  | 5.32 | 0.964 |
| CpG 10-12  | 13        | -1.09 | 3.09 | 0.724 | 11          | 2.61  | 4.88 | 0.592 |

Age was not associated with autism features scores in both males and females in this sample and therefore was not adjusted for; \*aggregate of CpG's 2-12; #aggregate computed as mean DNAm at CpG sites 1, 2, 6/7, 8/9 and 10-12.



**Table S16.** Spearman's rank correlation ( $\rho$ ) between FREE2m in NBS and DBS samples with *FMRI* expression in both sexes.

|           | FXS male |                  |               | FXS female |                  |                   |
|-----------|----------|------------------|---------------|------------|------------------|-------------------|
|           | N        | $\rho \pm SE$    | p             | N          | $\rho \pm SE$    | p                 |
| NBS       |          |                  |               |            |                  |                   |
| MS-QMA*   | 13       | $-0.30 \pm 0.29$ | 0.316         | 15         | $-0.23 \pm 0.27$ | 0.419             |
| EpiTYPER# | 13       | $-0.58 \pm 0.25$ | <b>0.037</b>  | 14         | $-0.65 \pm 0.22$ | <b>0.012</b>      |
| CpG 1     | 13       | $-0.63 \pm 0.23$ | 0.022         | 14         | $-0.54 \pm 0.24$ | 0.046             |
| CpG 2     | 13       | $-0.50 \pm 0.26$ | 0.082         | 13         | $-0.20 \pm 0.30$ | 0.505             |
| CpG 6/7   | 13       | $-0.38 \pm 0.28$ | 0.201         | 13         | $-0.60 \pm 0.24$ | <b>0.029+</b>     |
| CpG 8/9   | 13       | $-0.68 \pm 0.27$ | <b>0.009+</b> | 14         | $-0.75 \pm 0.19$ | <b>0.002+</b>     |
| CpG 10-12 | 13       | $-0.46 \pm 0.25$ | 0.117         | 14         | $-0.84 \pm 0.16$ | <b>&lt;0.001+</b> |
| DBS       |          |                  |               |            |                  |                   |
| MS-QMA*   | 17       | $-0.27 \pm 0.25$ | 0.291         | 16         | $-0.69 \pm 0.19$ | <b>0.003</b>      |
| EpiTYPER# | 17       | $-0.66 \pm 0.19$ | <b>0.004</b>  | 16         | $-0.82 \pm 0.15$ | <b>&lt;0.001</b>  |
| CpG 1     | 17       | $-0.42 \pm 0.23$ | 0.090         | 16         | $-0.76 \pm 0.17$ | <b>&lt;0.001+</b> |
| CpG 2     | 17       | $-0.64 \pm 0.20$ | <b>0.005+</b> | 15         | $-0.35 \pm 0.26$ | 0.205             |
| CpG 6/7   | 16       | $-0.50 \pm 0.23$ | 0.048         | 14         | $-0.87 \pm 0.14$ | <b>&lt;0.001+</b> |
| CpG 8/9   | 16       | $-0.38 \pm 0.25$ | 0.147         | 15         | $-0.78 \pm 0.17$ | <b>&lt;0.001+</b> |
| CpG 10-12 | 17       | $-0.50 \pm 0.22$ | 0.042         | 15         | $-0.80 \pm 0.17$ | <b>&lt;0.001+</b> |

Male results were first log transformed with cases with zero *FMRI* mRNA removed from the analysis. Female data was not transformed. \*aggregate of CpG's 2-12; #aggregate computed as mean DNAm at CpG sites 1, 2, 6/7, 8/9 and 10-12). DBS = dried blood spot; MS-QMA = methylation specific-quantitative melt analysis; NBS = newborn blood spot; +P-value in bold (p) remained <0.05 after adjustment for multiple testing of CpG 1 to CpG10-12.

**Table S17:** Spearman's rank correlation ( $\rho$ ) between NBS and DBS FREE2m and *FMRI* mRNA levels in FM only males and females.

|           | FM only males |        |       | FM only females |        |                   |
|-----------|---------------|--------|-------|-----------------|--------|-------------------|
|           | N             | $\rho$ | p     | N               | $\rho$ | p                 |
| NBS       |               |        |       |                 |        |                   |
| MS-QMA*   | 10            | -0.152 | 0.676 | 14              | -0.209 | 0.473             |
| EpiTYPER# | 10            | -0.091 | 0.803 | 13              | -0.654 | <b>0.015</b>      |
| CpG 1     | 10            | -0.176 | 0.626 | 13              | -0.603 | <b>0.029+</b>     |
| CpG 2     | 10            | -0.091 | 0.803 | 12              | -0.266 | 0.403             |
| CpG 6/7   | 10            | 0.333  | 0.347 | 12              | -0.525 | 0.080             |
| CpG 8/9   | 10            | -0.310 | 0.383 | 13              | -0.747 | <b>0.003+</b>     |
| CpG 10-12 | 10            | 0.103  | 0.777 | 13              | -0.845 | <b>&lt;0.001+</b> |
| DBS       |               |        |       |                 |        |                   |
| MS-QMA*   | 13            | -0.220 | 0.471 | 15              | -0.661 | <b>0.007</b>      |
| EpiTYPER# | 13            | -0.388 | 0.190 | 15              | -0.825 | <b>&lt;0.001</b>  |
| CpG 1     | 13            | -0.126 | 0.681 | 15              | -0.800 | <b>&lt;0.001+</b> |
| CpG 2     | 13            | -0.465 | 0.109 | 14              | -0.196 | 0.501             |
| CpG 6/7   | 12            | -0.004 | 0.991 | 13              | -0.868 | <b>&lt;0.001+</b> |
| CpG 8/9   | 13            | -0.308 | 0.306 | 14              | -0.780 | <b>0.001+</b>     |
| CpG 10-12 | 13            | -0.291 | 0.334 | 14              | -0.763 | <b>0.002+</b>     |

Male results were first log transformed with cases with zero *FMRI* mRNA removed from the analysis. Female data was not transformed. \*aggregate of CpG's 2-12; #aggregate computed as mean DNAm at CpG sites 1, 2, 6/7, 8/9 and 10-12. DBS = dried blood spot; MS-QMA = methylation specific-quantitative melt analysis; NBS = newborn blood spot; P-values (p) in bold indicate significance for aggregate measures indicating significance; P-values (p) in bold with + remained <0.05 after adjustment for multiple testing for site specific analyse.

**Table S18:** Spearman's rank correlations ( $\rho$ ) between NBS or DBS FREE2m and *FMRI* mRNA levels in FXS males and females with complete data.

|           | FXS males |        |               | FXS females |        |               |
|-----------|-----------|--------|---------------|-------------|--------|---------------|
|           | N         | $\rho$ | p             | N           | $\rho$ | p             |
| NBS       |           |        |               |             |        |               |
| MS-QMA*   | 12        | -0.10  | 0.762         | 12          | -0.18  | 0.586         |
| EpiTYPER# | 11        | -0.48  | 0.133         | 12          | -0.51  | 0.090         |
| CpG 1     | 11        | -0.66  | <i>0.026</i>  | 12          | -0.50  | 0.101         |
| CpG 2     | 11        | -0.53  | 0.096         | 11          | -0.17  | 0.610         |
| CpG 6/7   | 10        | -0.62  | 0.054         | 11          | -0.54  | 0.089         |
| CpG 8/9   | 10        | -0.16  | 0.663         | 11          | -0.64  | <i>0.035</i>  |
| CpG 10-12 | 11        | -0.32  | 0.340         | 11          | -0.59  | 0.056         |
| DBS       |           |        |               |             |        |               |
| MS-QMA*   | 12        | -0.21  | 0.512         | 12          | -0.67  | <b>0.018</b>  |
| EpiTYPER# | 11        | -0.62  | <b>0.040</b>  | 12          | -0.74  | <b>0.006</b>  |
| CpG 1     | 11        | -0.50  | 0.117         | 12          | -0.76  | <b>0.004+</b> |
| CpG 2     | 11        | -0.64  | <i>0.033</i>  | 11          | -0.26  | 0.432         |
| CpG 6/7   | 10        | -0.55  | 0.098         | 11          | -0.65  | <b>0.029+</b> |
| CpG 8/9   | 10        | -0.54  | 0.111         | 11          | -0.77  | <b>0.005+</b> |
| CpG 10-12 | 11        | -0.85  | <b>0.001+</b> | 11          | -0.74  | <b>0.010+</b> |

Male results were first log transformed with cases with zero *FMRI* mRNA removed from the analysis. Female data was not transformed. \*Aggregate of CpG's 2-12; #aggregate computed as mean DNAm at CpG sites 1, 2, 6/7, 8/9 and 10-12; P-value in bold is significant; P-values (p) in bold indicate significance for aggregate measures indicating significance; P-values (p) in bold with + remained <0.05 after adjustment for multiple testing for site specific analyses; italicised no longer <0.05 after adjusting for multiple testing for site specific analyses
